# Supplementary material for: A sensitive three-signal assay for the determination of PFOS based on the interaction with Nile blue A
Source: Royal Society of Chemistry journal article supplement (doi:10.1039/c8ay00938d), 2018-01-01
Supplement: c8ay00938d1.pdf [file c8ay00938d1.pdf]

**Supporting Information**

*for*

**A sensitive three-signal assay for the determination of PFOS based on the interaction with Nile blue A**

Qian Chen, Zhen Cheng, Lingling Du, Panpan Zhu and Kejun Tan\*

*Key Laboratory of Luminescent and Real-Time Analytical Chemistry, Ministry of Education, College of Chemistry and Chemical Engineering, Southwest University, Chongqing, 400715, PR China Fax: (+86) 23 68367257; Tel: (+86) 23 68367257; E-mail: tankj@swu.edu.cn.*

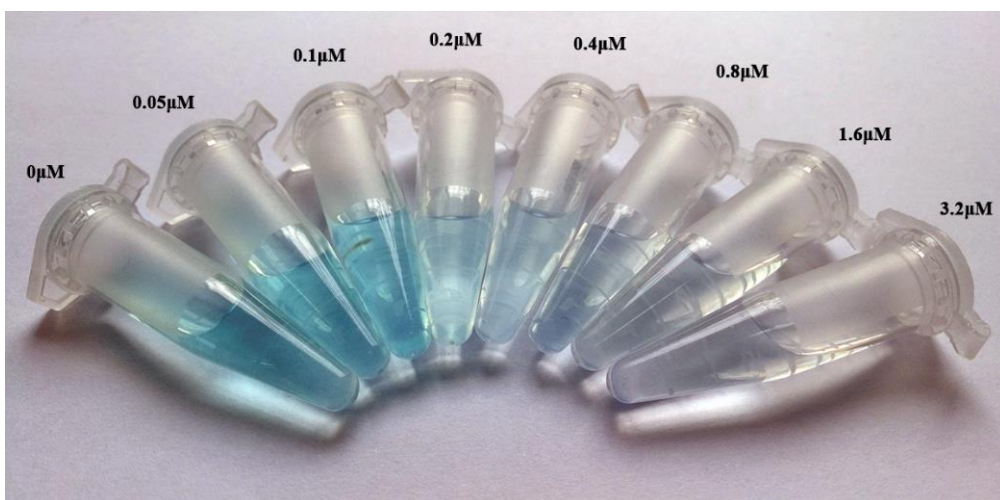

Fig.S1 Photograph of NBA in the presence of various concentrations of PFOS from 0  $\mu\text{mol/L}$  to 3.2  $\mu\text{mol/L}$ ; NBA, 0.3  $\mu\text{mol/L}$ ; pH, 3.3.

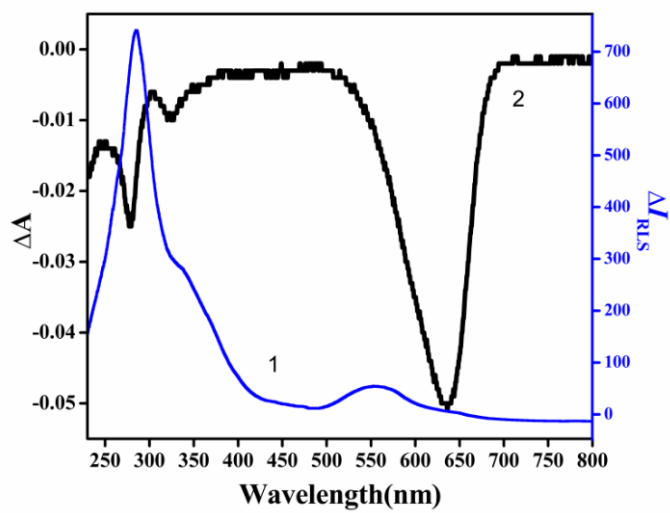

Fig. S2 (1) Differential RLS intensity. (2) Differential absorbance intensity of NBA towards PFOS. PFOS, 4.0  $\mu\text{mol/L}$ ; NBA, 0.3  $\mu\text{mol/L}$ ; pH, 3.3.

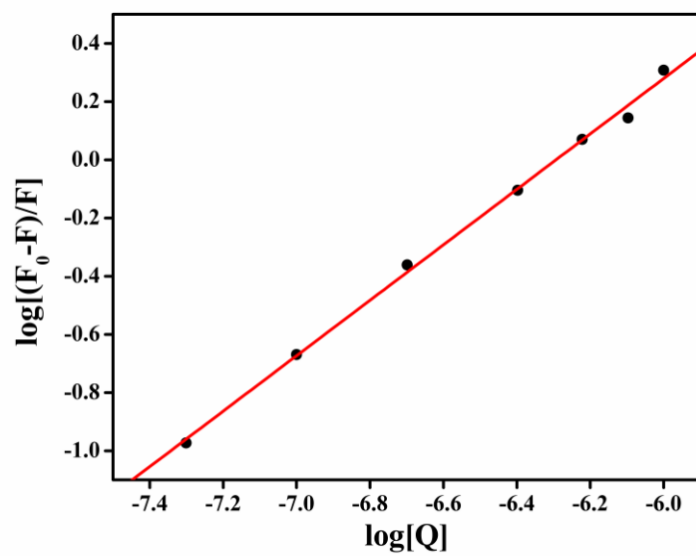

Fig. S3 Double-log plots of PFOS quenching NBA fluorescence.

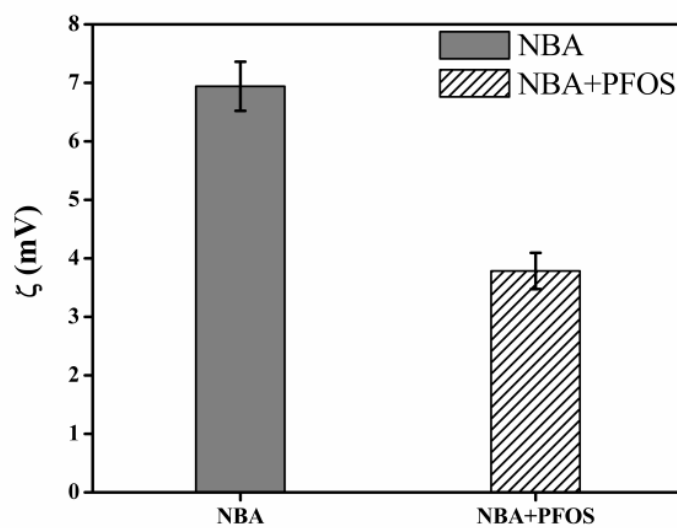

Fig. S4 Zeta potential of NBA and NBA-PFOS in optimum conditions.

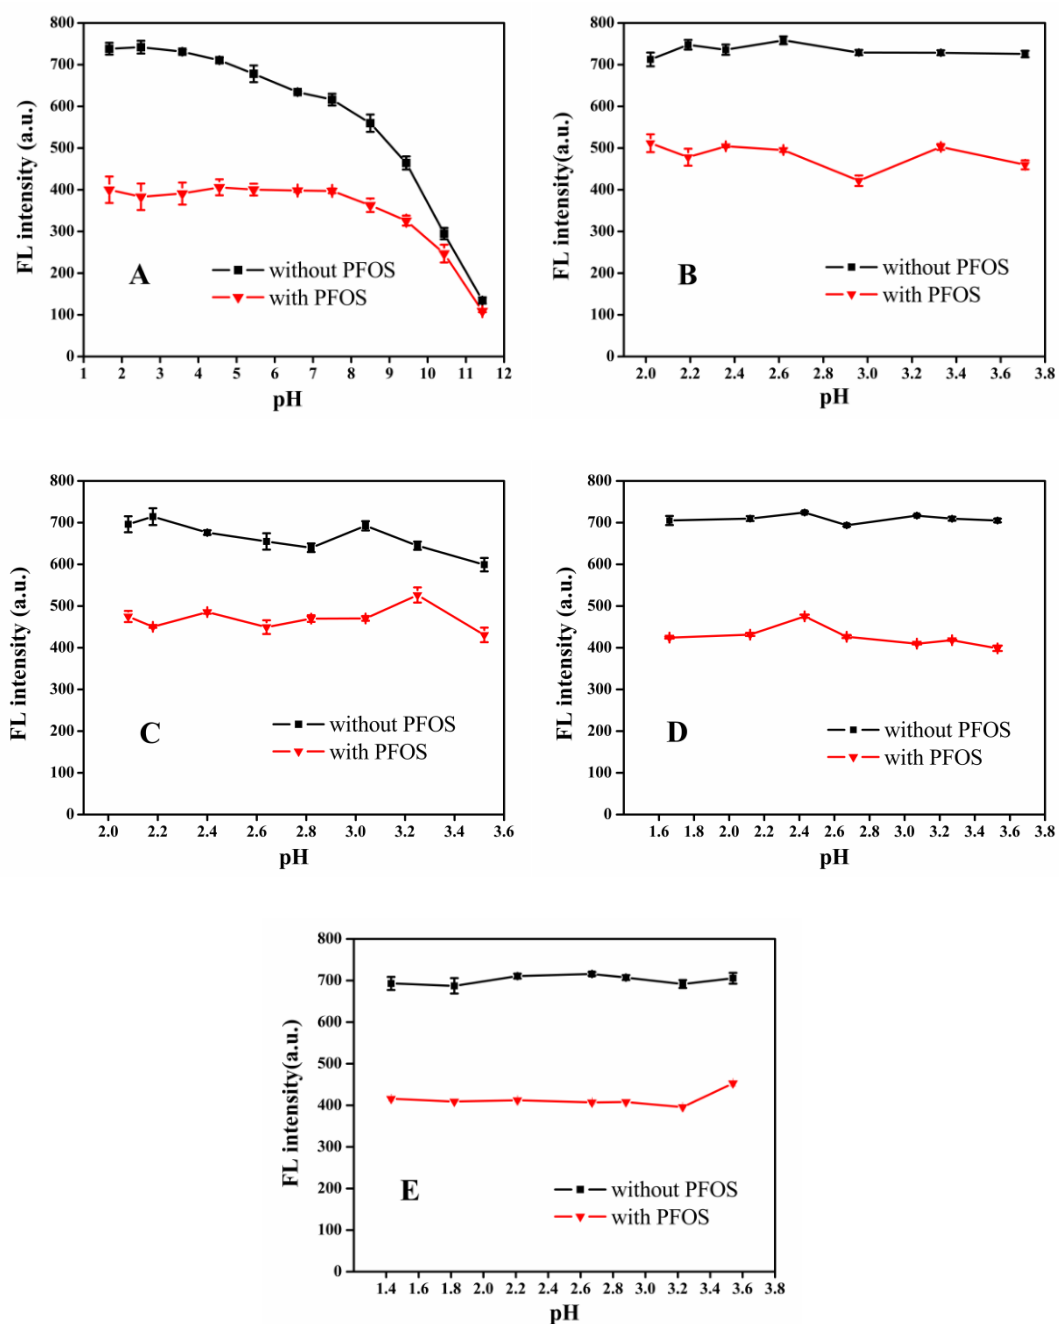

Fig. S5 Effect of pH on the fluorescence intensity of NBA in the absence and presence of PFOS. Concentration: PFOS, 1.0  $\mu\text{mol/L}$ ; NBA, 0.3  $\mu\text{mol/L}$ ; pH, 3.3. (A) BR. (B) Sodium tartaric-tartaric. (C) PHP-HCl. (D) Sodium citrate-HCl. (E) Glycine-HCl.

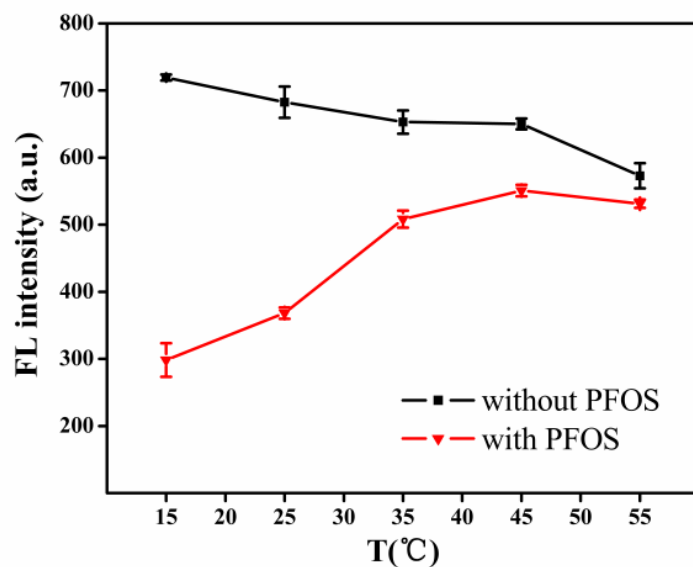

Fig. S6 Effect of temperature on the fluorescence intensity of NBA in the absence and presence of PFOS. Concentration: PFOS, 1.0  $\mu\text{mol/L}$ ; NBA, 0.3  $\mu\text{mol/L}$ ; pH, 3.3.

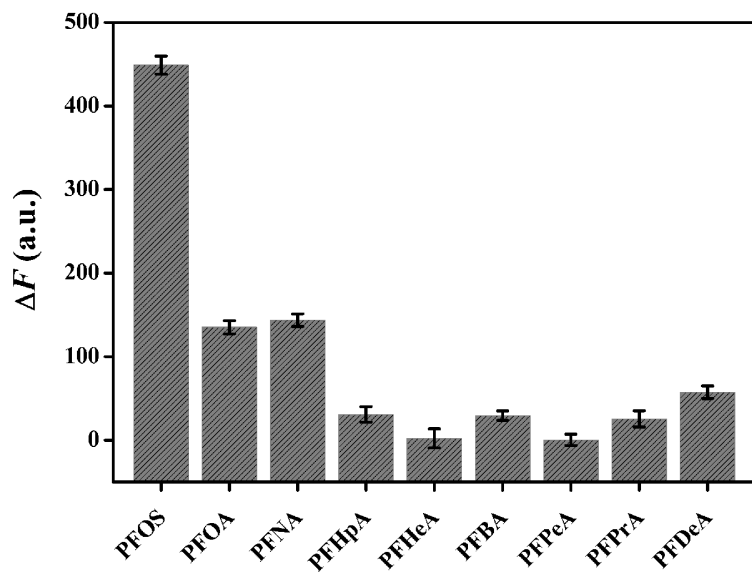

Fig. S7 The fluorescence intensity decreased value  $\Delta F$  ( $F_0 - F$ ) of NBA towards various perfluorinated compounds, respectively. PFCs, 1.0  $\mu\text{mol/L}$ , NBA, 0.3  $\mu\text{mol/L}$ ; pH, 3.3.

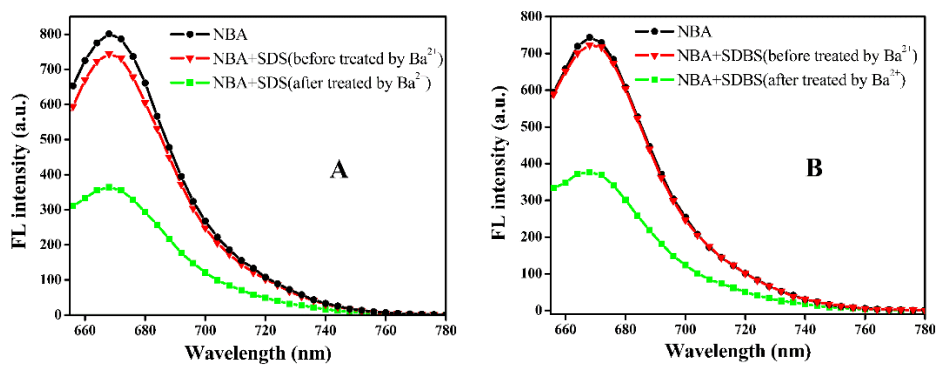

Fig. S8 Fluorescence intensity of NBA/PFOS, (A) the mixture of NBA/PFOS and SDS before and after treated by Ba<sup>2+</sup>, (B) the mixture of NBA/PFOS and SDBS before and after treated by Ba<sup>2+</sup>. Concentration: Ba<sup>2+</sup>, 500.0  $\mu\text{mol/L}$ ; SDBS, 1.0  $\mu\text{mol/L}$ ; SDS, 1.0  $\mu\text{mol/L}$ . pH, 3.3.
